# Supplementary material for: Impact of Type 1 Versus Type 2 Diabetes on Developing Herpes Zoster and Post-herpetic Neuralgia: A Population-based Cohort Study
Source: PubMed Central journal article supplement — Acta Derm Venereol. 2023 Oct 3;103:9400. doi: 10.2340/actadv.v103.9400 (PMC10561104; doi:10.2340/actadv.v103.9400), 2023-10-03
Supplement: ActaDV-103-9400-s1.pdf [file ActaDV-103-9400-s1.pdf]

Supplementary material has been published as submitted. It has not been copyedited, typeset or checked for scientific content by Acta Dermato-Venereologica

**Table SI. Baseline characteristics of the participants according to the diabetes status**

| Characteristics                              | Data before IPTW <sup>a</sup> |                              |        | Data after IPTW <sup>b</sup> |             |        |
|----------------------------------------------|-------------------------------|------------------------------|--------|------------------------------|-------------|--------|
|                                              | DM ( <i>n</i> = 1,557,897)    | Non-DM ( <i>n</i> = 210,216) | STD    | DM                           | Non-DM      | STD    |
| Age (years)                                  | 57.5 ± 13.4                   | 55.4 ± 13.8                  | 0.15   | 57.2 ± 13.4                  | 58.2 ± 13.4 | - 0.07 |
| Age group                                    |                               |                              |        |                              |             |        |
| < 20 years                                   | 10,356 (0.7)                  | 1,946 (0.9)                  | -0.03  | 0.7                          | 0.6         | 0.01   |
| 20-39 years                                  | 129,223 (8.3)                 | 21,907 (10.4)                | -0.07  | 8.6                          | 7.4         | 0.04   |
| 40-59 years                                  | 752,211 (48.3)                | 114,186 (54.3)               | -0.12  | 49.0                         | 47.1        | 0.04   |
| 60-79 years                                  | 605,606 (38.9)                | 63,309 (30.1)                | 0.19   | 37.8                         | 40.8        | -0.06  |
| ≥ 80 years                                   | 60,501 (3.9)                  | 8,868 (4.2)                  | -0.02  | 3.9                          | 4.1         | -0.01  |
| Male gender                                  | 816,170 (52.4)                | 117,467 (55.9)               | - 0.07 | 52.8                         | 54.6        | - 0.04 |
| Urbanization level                           |                               |                              |        |                              |             |        |
| Low                                          | 182,538 (11.7)                | 22,068 (10.5)                | 0.04   | 11.6                         | 11.9        | -0.01  |
| Moderate                                     | 486,232 (31.2)                | 62,796 (29.9)                | 0.03   | 31.1                         | 31.3        | -0.01  |
| High                                         | 467,973 (30.0)                | 63,538 (30.2)                | <0.01  | 30.1                         | 29.8        | 0.01   |
| Very High                                    | 421,154 (27.0)                | 61,814 (29.4)                | -0.05  | 27.3                         | 27.1        | <0.01  |
| Monthly income, NTD                          |                               |                              |        |                              |             |        |
| 0 – 17,880                                   | 527,816 (33.9)                | 76,464 (36.4)                | -0.05  | 34.2                         | 34.8        | -0.01  |
| 17,881 – 22,800                              | 557,730 (35.8)                | 66,217 (31.5)                | 0.09   | 35.3                         | 35.8        | -0.01  |
| > 22,800                                     | 472,351 (30.3)                | 67,535 (32.1)                | -0.04  | 30.5                         | 29.4        | 0.03   |
| Type of DM                                   |                               |                              |        |                              |             |        |
| None                                         | -                             | 210,216 (100)                | -      | -                            | -           | -      |
| Type 1                                       | 99,566 (6.4)                  | -                            | -      | -                            | -           | -      |
| Type 2                                       | 1,458,331 (93.6)              | -                            | -      | -                            | -           | -      |
| Comorbidities of DM or risk factor of zoster |                               |                              |        |                              |             |        |

| Characteristics              | Data before IPTW <sup>a</sup> |                                 |      | Data after IPTW <sup>b</sup> |           |       |
|------------------------------|-------------------------------|---------------------------------|------|------------------------------|-----------|-------|
|                              | DM ( <i>n</i> =<br>1,557,897) | Non-DM ( <i>n</i> =<br>210,216) | STD  | DM                           | Non-DM    | STD   |
| Depression                   | 42,749 (2.7)                  | 3,792 (1.8)                     | 0.06 | 2.6                          | 3.2       | -0.03 |
| Obstructive sleep<br>apnea   | 3,086 (0.2)                   | 203 (0.1)                       | 0.03 | 0.2                          | 0.2       | -0.01 |
| Chronic kidney<br>disease    | 93,727 (6.0)                  | 3,817 (1.8)                     | 0.22 | 5.5                          | 7.0       | -0.06 |
| Hyperlipidemia               | 334,691 (21.5)                | 10,589 (5.0)                    | 0.50 | 19.5                         | 25.3      | -0.14 |
| Hypertension                 | 668,388 (42.9)                | 33,930 (16.1)                   | 0.61 | 39.7                         | 44.9      | -0.10 |
| Cardiovascular<br>disease    |                               |                                 |      |                              |           |       |
| Old stroke                   | 90,620 (5.8)                  | 5,829 (2.8)                     | 0.15 | 5.5                          | 6.8       | -0.05 |
| Coronary artery<br>disease   | 180,783 (11.6)                | 10,362 (4.9)                    | 0.24 | 10.8                         | 14.2      | -0.10 |
| Peripheral artery<br>disease | 21,862 (1.4)                  | 1,286 (0.6)                     | 0.08 | 1.3                          | 1.8       | -0.04 |
| Heart failure                | 31,196 (2.0)                  | 2,092 (1.0)                     | 0.08 | 1.9                          | 2.3       | -0.03 |
| COPD                         | 80,859 (5.2)                  | 7,428 (3.5)                     | 0.08 | 5.0                          | 5.8       | -0.03 |
| Asthma                       | 53,255 (3.4)                  | 4,497 (2.1)                     | 0.08 | 3.3                          | 3.6       | -0.02 |
| Follow up year               | 7.2 ± 4.2                     | 7.1 ± 4.2                       | 0.03 | 7.2 ± 4.2                    | 6.7 ± 4.2 | 0.10  |

<sup>a</sup>Value are given as number (%) or mean ± standard deviation. <sup>b</sup>Values are given as % or mean ± standard deviation.

DM: diabetes mellitus; IPTW: inverse probability treatment weighting; STD: standardized difference; COPD: chronic obstructive pulmonary disease.

**Table SII. Baseline characteristics of the zoster patients according to the diabetes status**

| Characteristics                                 | Data before IPTW <sup>a</sup> |                               |       | Data after IPTW <sup>b</sup> |                |       |
|-------------------------------------------------|-------------------------------|-------------------------------|-------|------------------------------|----------------|-------|
|                                                 | DM ( <i>n</i> =<br>64,064)    | Non-DM ( <i>n</i> =<br>8,033) | STD   | DM                           | Non-DM         | STD   |
| Age (years)                                     | 64.6 ± 11.7                   | 63.6 ± 12.2                   | 0.08  | 64.5 ±<br>11.7               | 65.1 ±<br>11.8 | -0.06 |
| Age group                                       |                               |                               |       |                              |                |       |
| < 20 years                                      | 82 (0.1)                      | 12 (0.1)                      | -0.01 | 0.13                         | 0.13           | <0.01 |
| 20-39 years                                     | 1,174 (1.8)                   | 168 (2.1)                     | -0.02 | 1.9                          | 1.6            | 0.02  |
| 40-59 years                                     | 21,824 (34.1)                 | 3,161 (39.4)                  | -0.11 | 34.6                         | 32.3           | 0.05  |
| 60-79 years                                     | 34,856 (54.4)                 | 3,901 (48.6)                  | 0.12  | 53.8                         | 55.7           | -0.04 |
| ≥ 80 years                                      | 6,128 (9.6)                   | 791 (9.8)                     | -0.01 | 9.6                          | 10.2           | -0.02 |
| Male gender                                     | 32,599 (50.9)                 | 4,018 (50.0)                  | 0.02  | 50.8                         | 53.3           | -0.05 |
| Urbanization level                              |                               |                               |       |                              |                |       |
| Low                                             | 6,959 (10.9)                  | 904 (11.3)                    | -0.01 | 10.9                         | 11.3           | -0.01 |
| Moderate                                        | 19,760 (30.8)                 | 2,384 (29.7)                  | 0.03  | 30.7                         | 31.0           | -0.01 |
| High                                            | 18,941 (29.6)                 | 2,335 (29.1)                  | 0.01  | 29.5                         | 28.4           | 0.02  |
| Very High                                       | 18,404 (28.7)                 | 2,410 (30.0)                  | -0.03 | 28.9                         | 29.3           | -0.01 |
| Monthly income, NTD                             |                               |                               |       |                              |                |       |
| 0 – 17,880                                      | 22,265 (34.8)                 | 2,977 (37.1)                  | -0.05 | 35.0                         | 37.6           | -0.05 |
| 17,881 – 22,800                                 | 22,538 (35.2)                 | 2,654 (33.0)                  | 0.05  | 34.9                         | 34.5           | 0.01  |
| > 22,800                                        | 19,261 (30.1)                 | 2,402 (29.9)                  | <0.01 | 30.0                         | 27.9           | 0.05  |
| Type of DM                                      |                               |                               |       |                              |                |       |
| None                                            | 0 (0.0)                       | 8,033 (100.0)                 | -     | -                            | -              | -     |
| Type 1                                          | 4,658 (7.3)                   | -                             | -     | -                            | -              | -     |
| Type 2                                          | 59,406 (92.7)                 | -                             | -     | -                            | -              | -     |
| Comorbidities of DM or<br>risk factor of zoster |                               |                               |       |                              |                |       |
| Depression                                      | 1,050 (1.6)                   | 120 (1.5)                     | 0.01  | 1.6                          | 1.9            | -0.02 |
| Obstructive sleep apnea                         | 74 (0.12)                     | 6 (0.07)                      | 0.01  | 0.11                         | 0.06           | 0.02  |
| Chronic kidney disease                          | 3,534 (5.5)                   | 160 (2.0)                     | 0.19  | 5.1                          | 6.5            | -0.06 |
| Hyperlipidemia                                  | 12,996 (20.3)                 | 432 (5.4)                     | 0.46  | 18.6                         | 23.1           | -0.11 |
| Hypertension                                    | 27,005 (42.2)                 | 1,401 (17.4)                  | 0.56  | 39.4                         | 43.9           | -0.09 |

| Characteristics           | Data before IPTW <sup>a</sup> |                               |      | Data after IPTW <sup>b</sup> |           |       |
|---------------------------|-------------------------------|-------------------------------|------|------------------------------|-----------|-------|
|                           | DM ( <i>n</i> =<br>64,064)    | Non-DM ( <i>n</i> =<br>8,033) | STD  | DM                           | Non-DM    | STD   |
| Cardiovascular disease    |                               |                               |      |                              |           |       |
| Old stroke                | 2,728 (4.3)                   | 187 (2.3)                     | 0.11 | 4.0                          | 5.3       | -0.06 |
| Coronary artery disease   | 7,772 (12.1)                  | 463 (5.8)                     | 0.22 | 11.4                         | 15.1      | -0.11 |
| Peripheral artery disease | 901 (1.4)                     | 49 (0.6)                      | 0.08 | 1.3                          | 1.7       | -0.03 |
| Heart failure             | 934 (1.5)                     | 64 (0.8)                      | 0.06 | 1.4                          | 1.8       | -0.03 |
| COPD                      | 3,313 (5.2)                   | 318 (4.0)                     | 0.06 | 5.0                          | 6.3       | -0.06 |
| Asthma                    | 2,073 (3.2)                   | 220 (2.7)                     | 0.03 | 3.2                          | 3.7       | -0.03 |
| Follow up year            | 4.5 ± 3.2                     | 4.3 ± 3.2                     | 0.08 | 4.5 ± 3.2                    | 4.5 ± 3.3 | -0.02 |

<sup>a</sup>Value are given as number (%) or mean ± standard deviation. <sup>b</sup>Values are given as % or mean ± standard deviation.
